# Supplementary material
Source: publisher site journal article supplement (https://www.dovepress.com/article/185875)

**Supplementary materials:**

**A six-mRNA prognostic model to predict survival in head and neck squamous cell carcinoma**

Saisai Tian1, Guofeng Meng2, Weidong Zhang1,2,*

1 Department of Phytochemistry, School of Pharmacy, the Second Military Medical University, Shanghai 200433, P. R. China.

2 Institute of Interdisciplinary Integrative Medicine Research, Shanghai University of Traditional Chinese Medicine, Shanghai, P.R. China.

Correspondence: Weidong Zhang

Tel +86 021871 244

Fax +86 021871 244

Email wdzhangy@hotmail.com

**Supplementary Tables**

**Table S1. Clinical characteristics of HNSCC patients in TCGA.**

| **Characteristic** | **Training set** | **Testing set** | **Total** |
| --- | --- | --- | --- |
| **Age** |  |  |  |
| Median | 62 | 60 | 61 |
| Range | 24-90 | 19-88 | 19-90 |
| **Sex** |  |  |  |
| Male | 213 | 135 | 348 |
| Female | 74 | 55 | 129 |
| **Tumor Grade** |  |  |  |
| G1 | 40 | 21 | 61 |
| G2 | 178 | 118 | 296 |
| G3 | 67 | 51 | 118 |
| G4 | 2 | 0 | 2 |
| **Alcohol** |  |  |  |
| Yes | 189 | 130 | 319 |
| No | 91 | 57 | 148 |
| Unknown | 7 | 3 | 10 |
| **Smoke** | | | |
| Yes | 174 | 30 | 204 |
| No | 113 | 160 | 273 |
| **pTNM stage** | | | |
| Stage I | 12 | 13 | 25 |
| Stage II | 43 | 22 | 65 |
| Stage III | 42 | 33 | 75 |
| Stage IV | 149 | 98 | 247 |
| Unknown | 41 | 24 | 65 |
| **HPV status** | | | |
| Positive | 10 | 4 | 14 |
| Negative | 41 | 22 | 63 |
| Unkonwn | 236 | 164 | 400 |
| **Radiotherapy** | | | |
| Yes | 67 | 44 | 111 |
| No | 37 | 21 | 58 |
| Unknown | 183 | 125 | 308 |
| **Vital status** | | | |
| Living | 125 | 83 | 208 |
| Dead | 162 | 107 | 269 |

**Table S2. The enriched KEGG pathways associated with six mRNAs**

| **ID** | **Description** | **setSize** | **enrichmentScore** | **NES** | **pvalue** |
| --- | --- | --- | --- | --- | --- |
| hsa04020 | Calcium signaling pathway | 182 | 0.437 | 1.540 | 0.002 |
| hsa04022   |  | | --- | | cGMP-PKG signaling pathway | 159 | 0.458 | 1.600 | 0.003 |
| hsa04151 | PI3K-Akt signaling pathway | 340 | 0.345 | 1.295 | 0.017 |
| hsa03030 | DNA replication | 36 | 0.514 | 1.433 | 0.044 |
| hsa04015 | Rap1 signaling pathway | 205 | 0.357 | 1.277 | 0.038 |
| hsa04668 | TNF signaling pathway | 110 | 0.406 | 1.348 | 0.030 |

**Supplementary Figures**

**Figure S1 The volcano plots of genomic genes.** The plot was constructed using fold-change values and padj-values. The vertical lines correspond to 2.0-fold up- and downregulation between tumor samples and nontumor samples in HNSCC, and the horizontal line represents a padj-value. The red points in the plot represent the differentially expressed mRNAs with statistical significance.


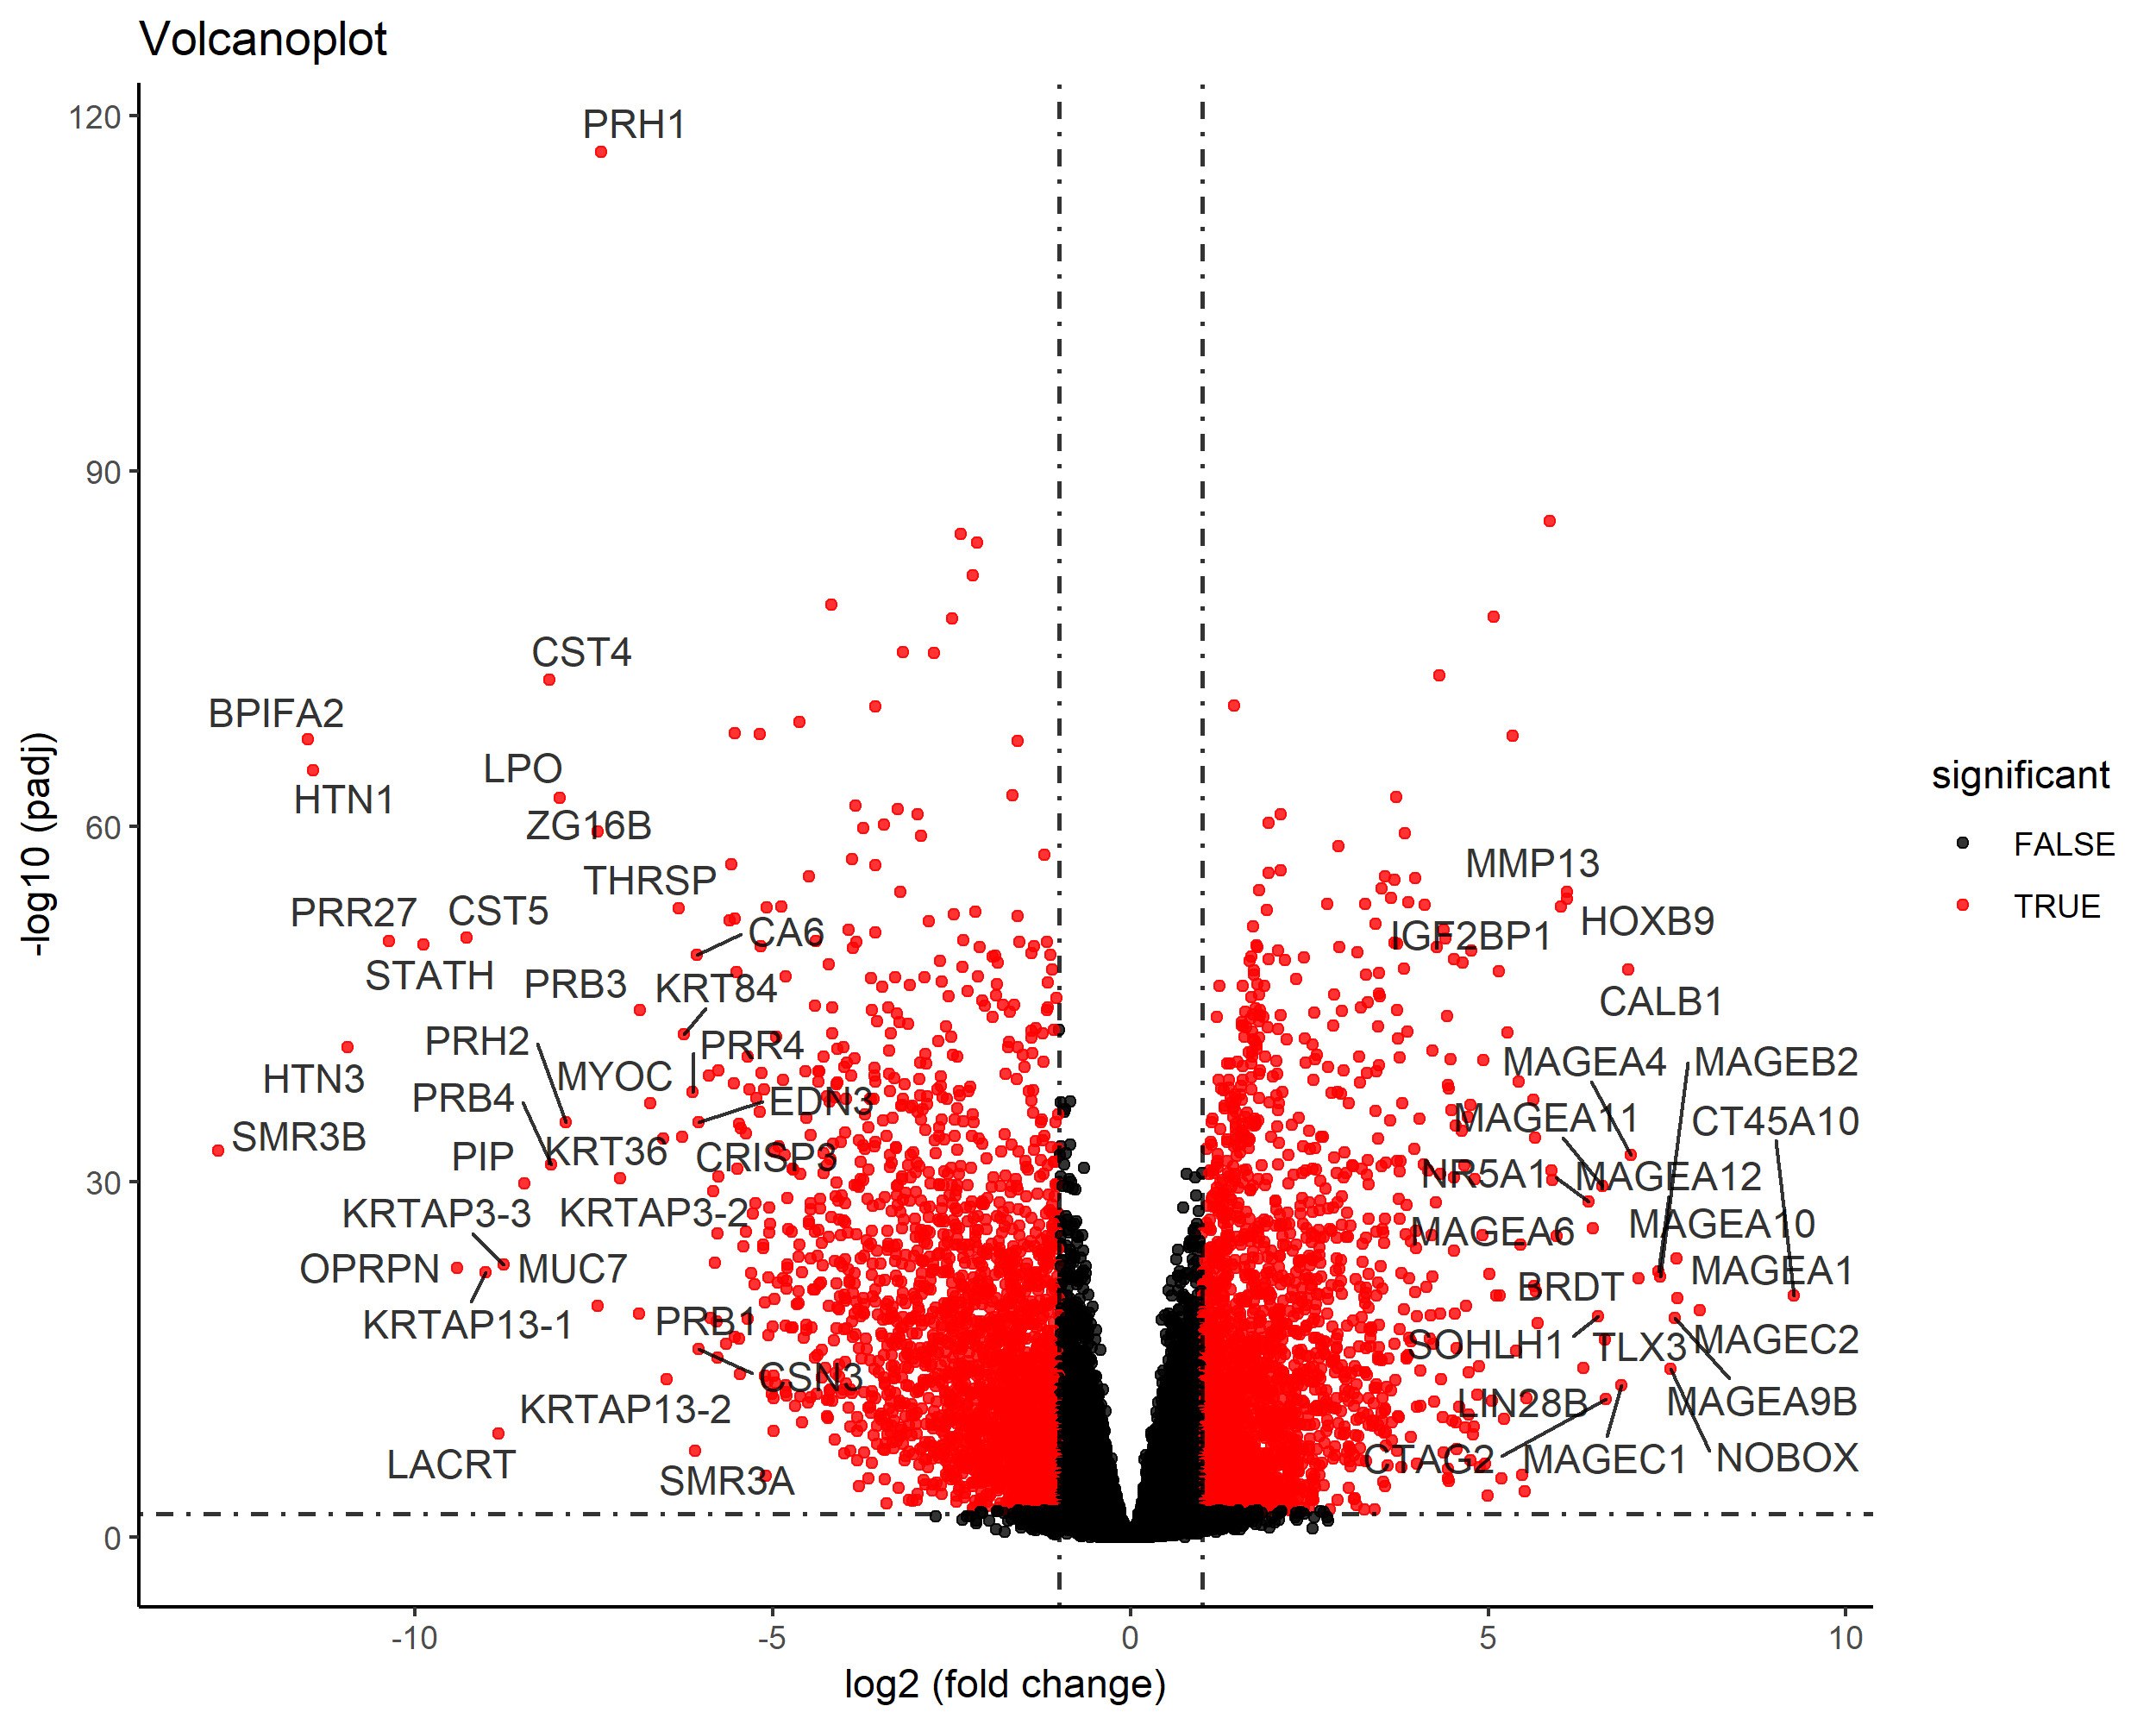


**Figure S2** **Samples clustering to detect outliers (entire dataset).** The clustering was based on the expression data of differentially expressed genes in HNSCC.


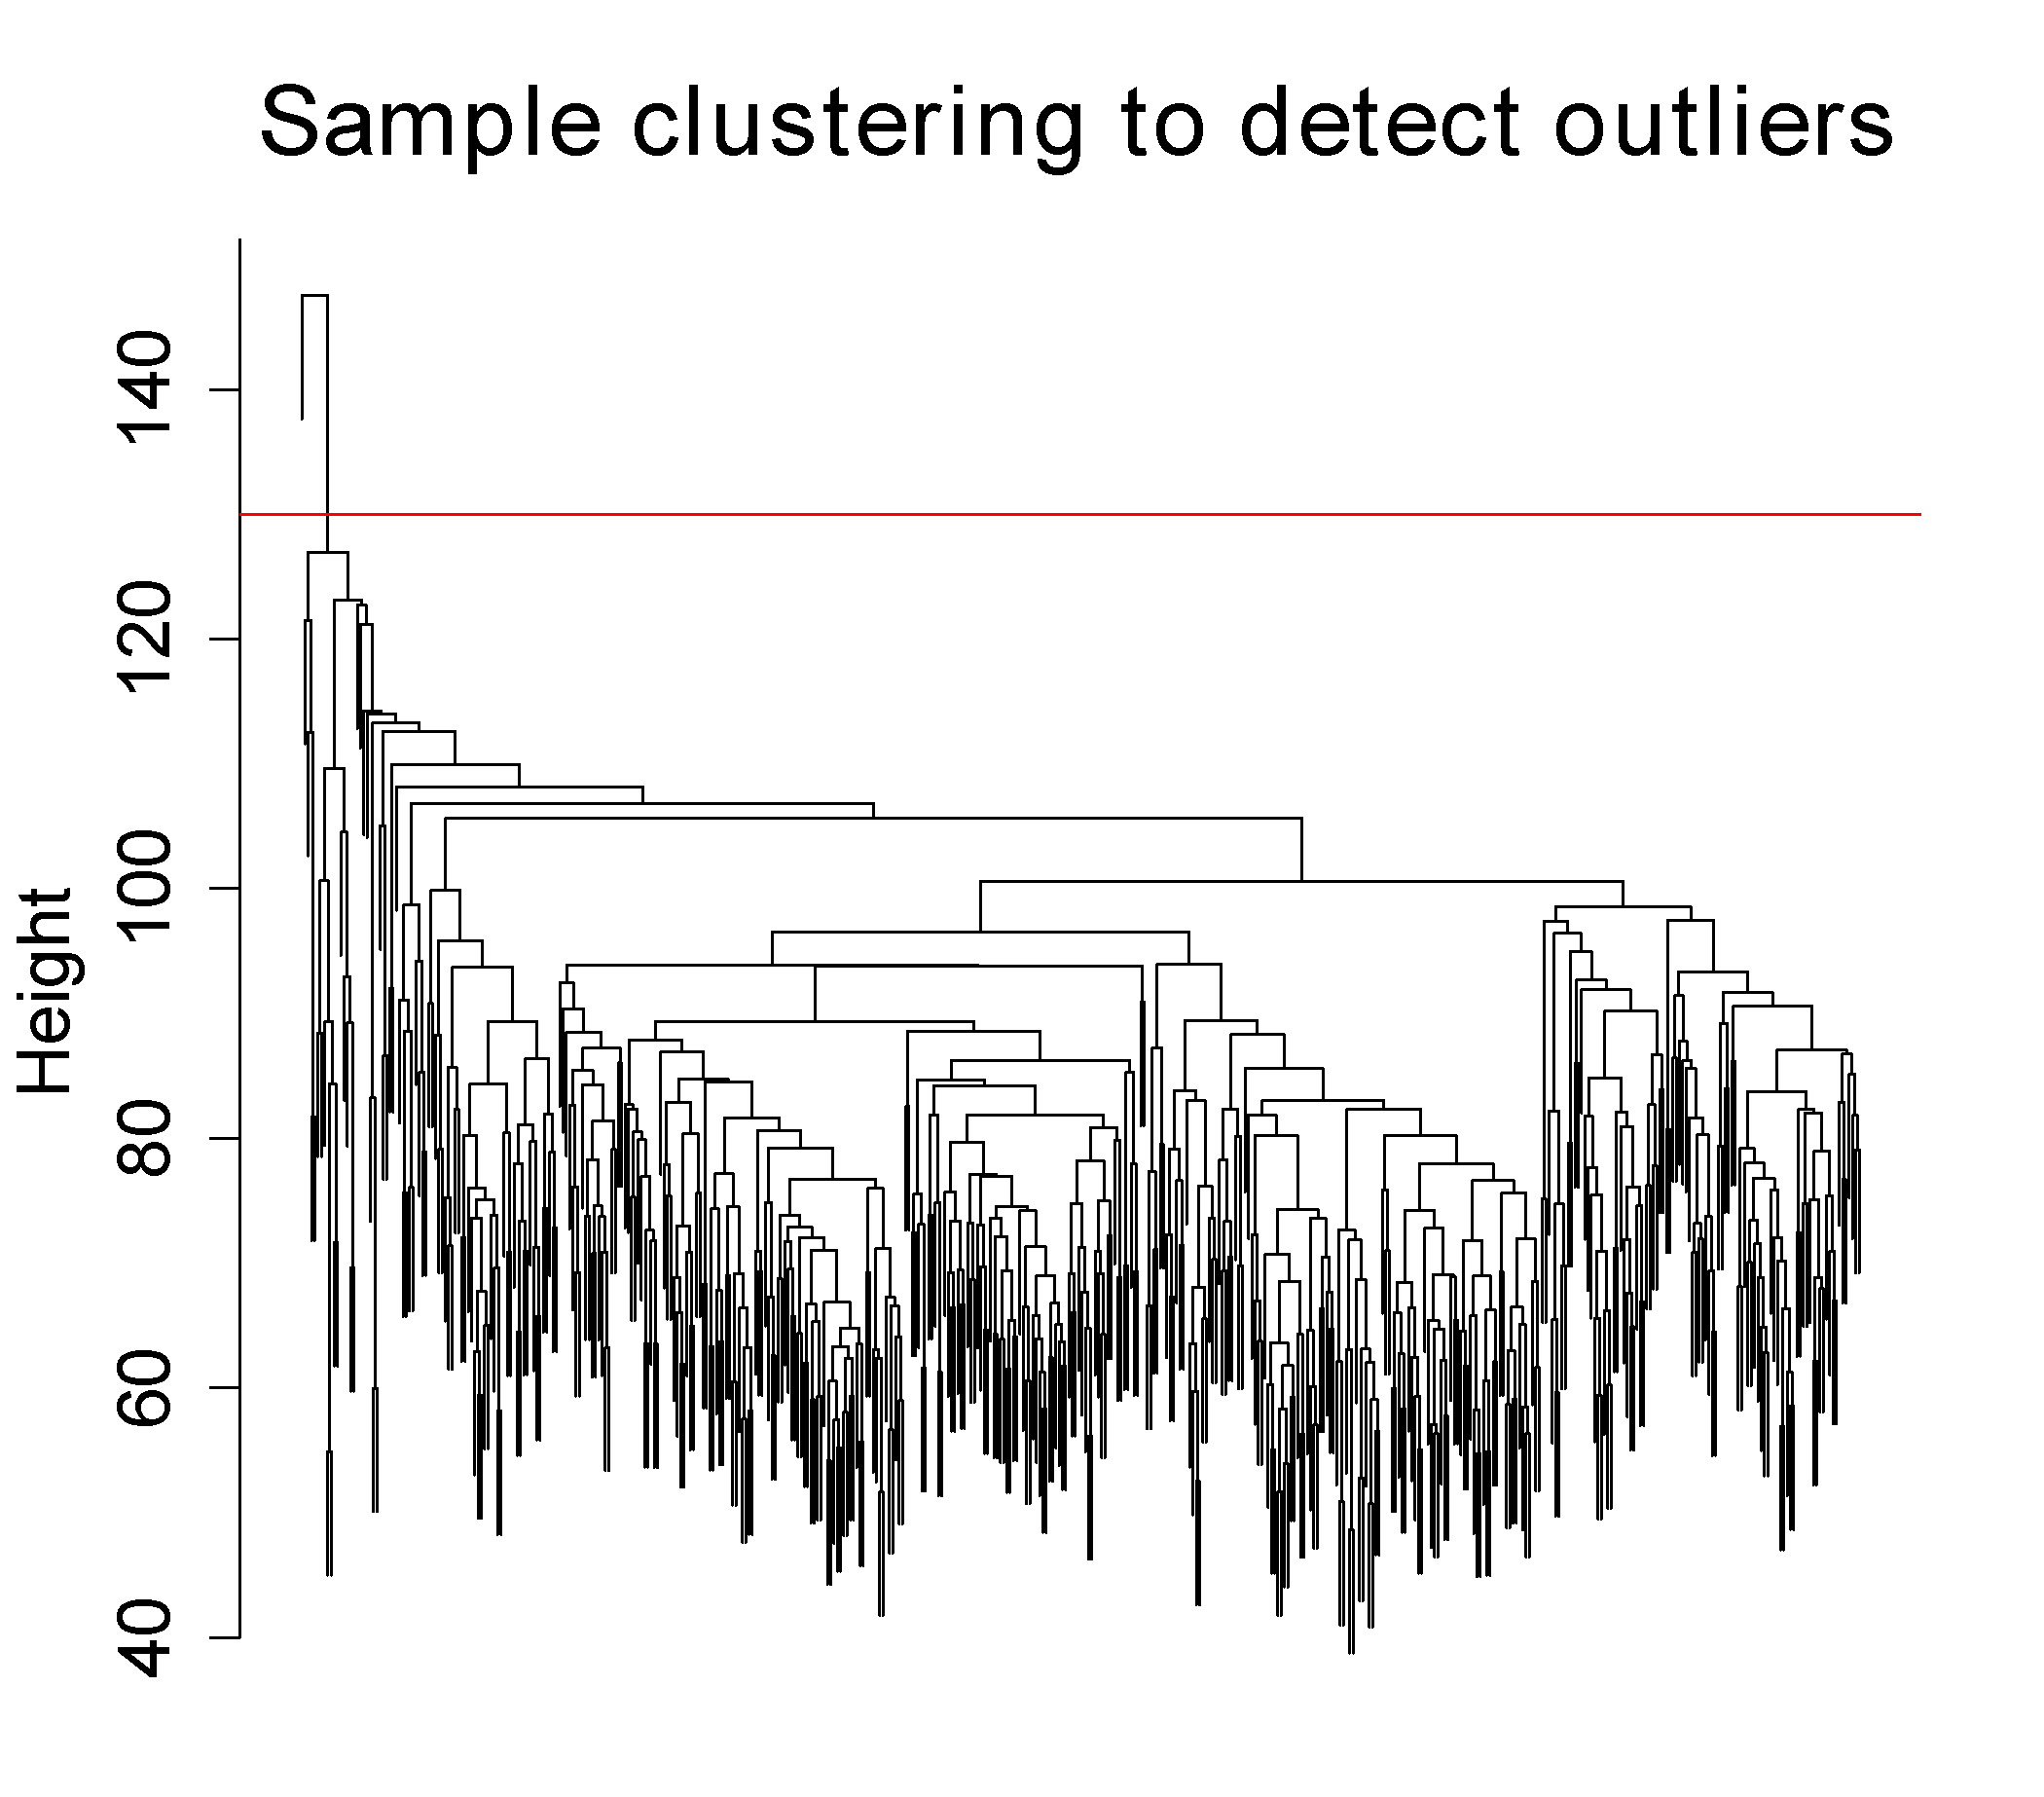


**Figure S3 Determination of soft-thresholding power in WGCNA.** (A) Analysis of the scale-free fit index for various soft-thresholding powers (β). (B) Analysis of the mean connectivity for various soft-thresholding powers. (C) Histogram of connectivity distribution when β=4. (D) Checking the scale free topology when β=4. (E) Dendrogram of all differentially expressed genes clustered based on a dissimilarity measure (1-TOM).


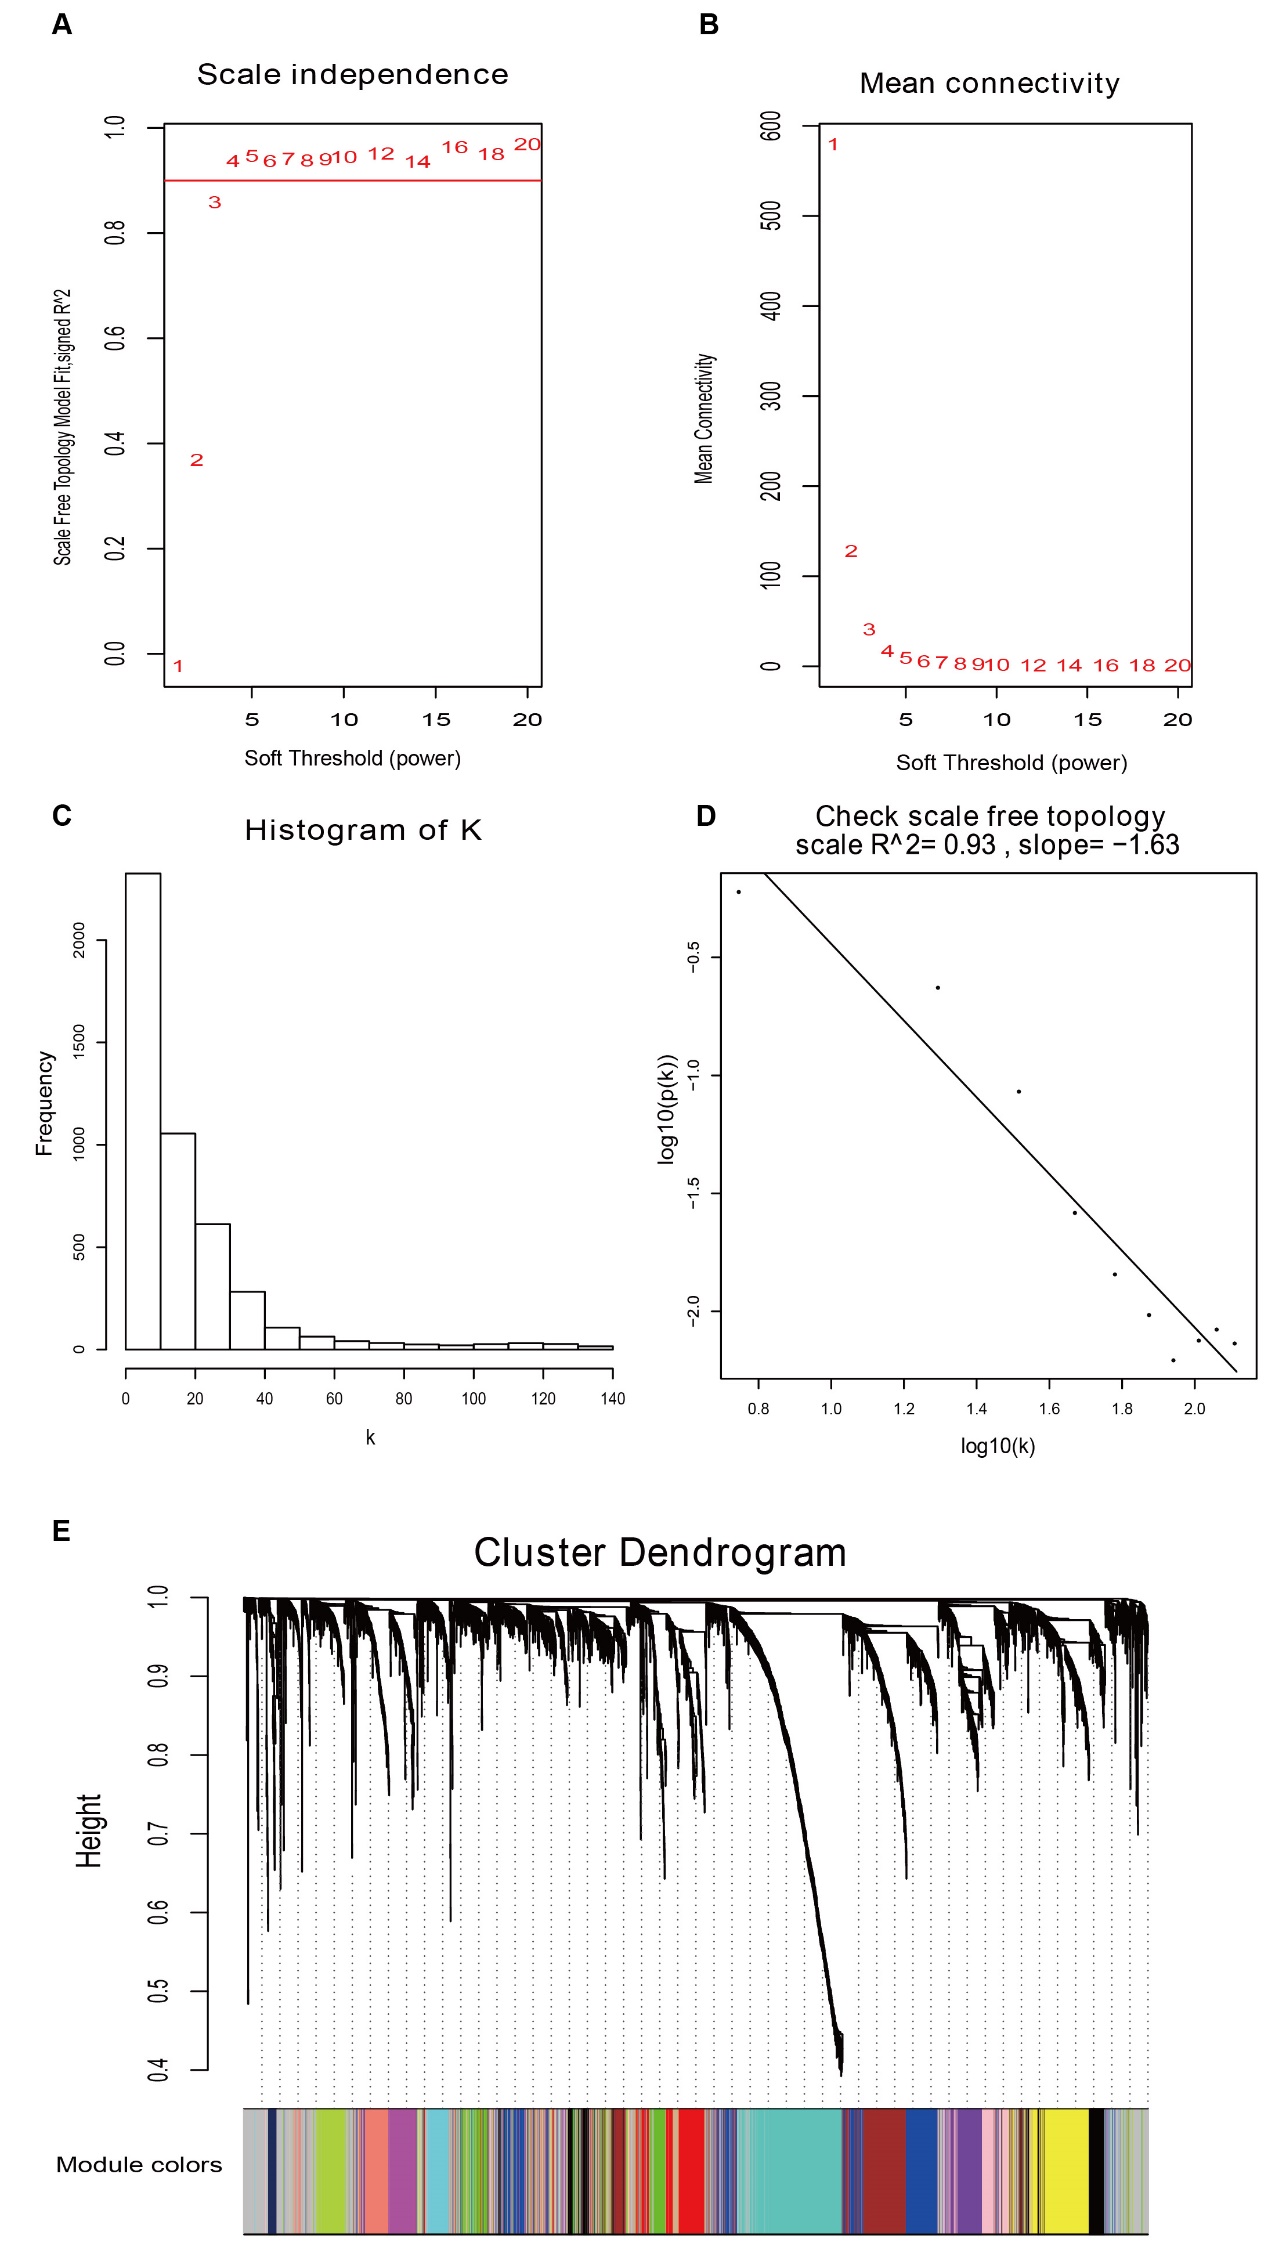


**Figure S4** **Selection of optimal tuning parameter in the LASSO model.** The dotted vertical lines are drawn at the optimal values by minimum criteria (left) and 1-SE criteria (right). The optimal= 0.0810 was determined by ten-time cross-validation via minimum criteria. Error bars represent standard error (SE).


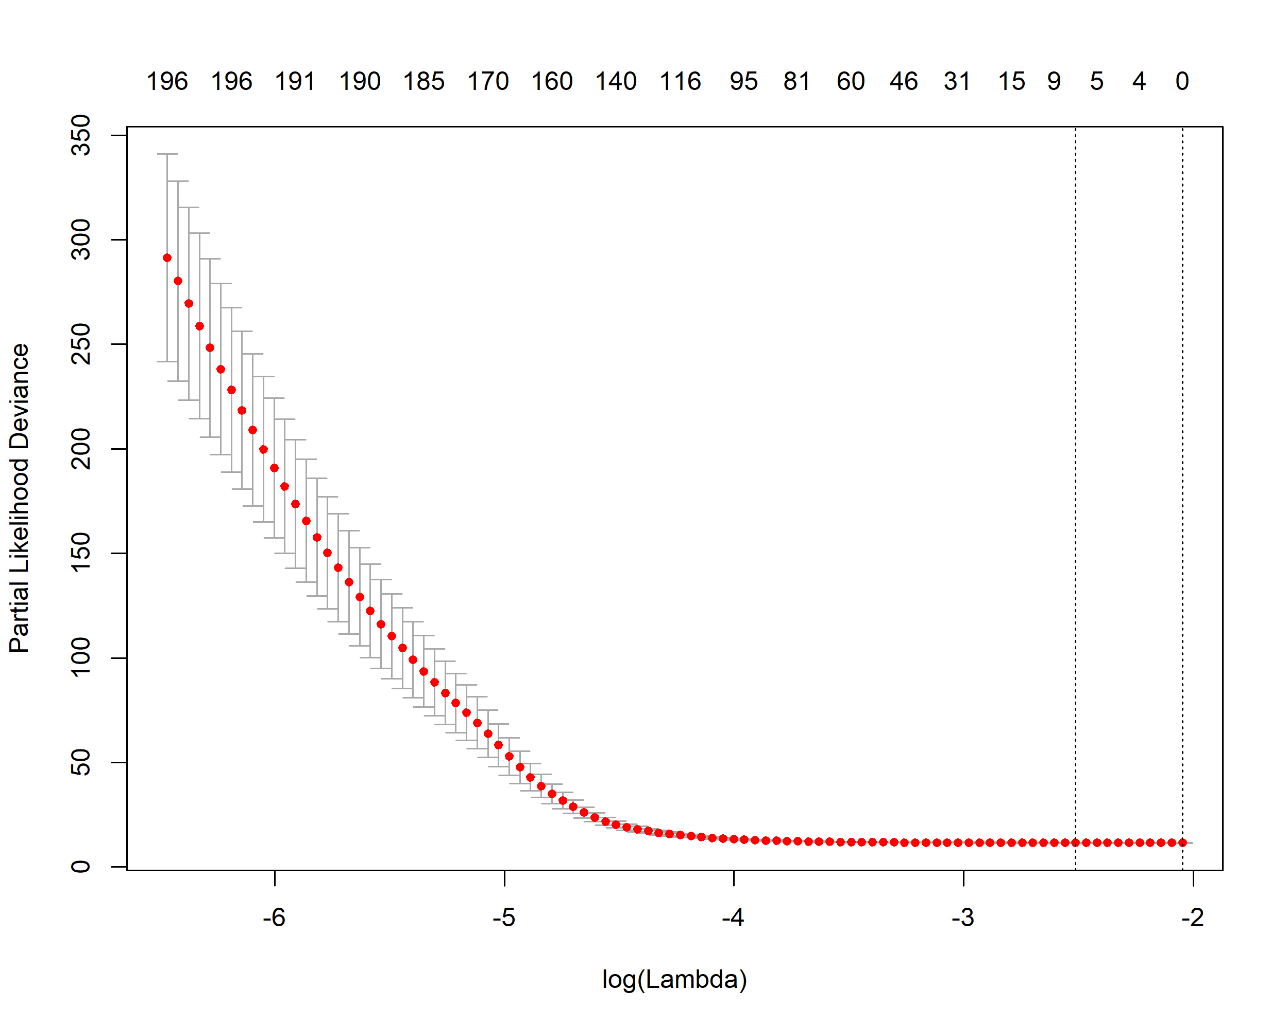


**Figure S5**. **Construction of the six-mRNA signature model.** LASSO coefficient profiles of the 339 associated mRNAs. A vertical line is drawn at the value determined by 10-fold cross validation.


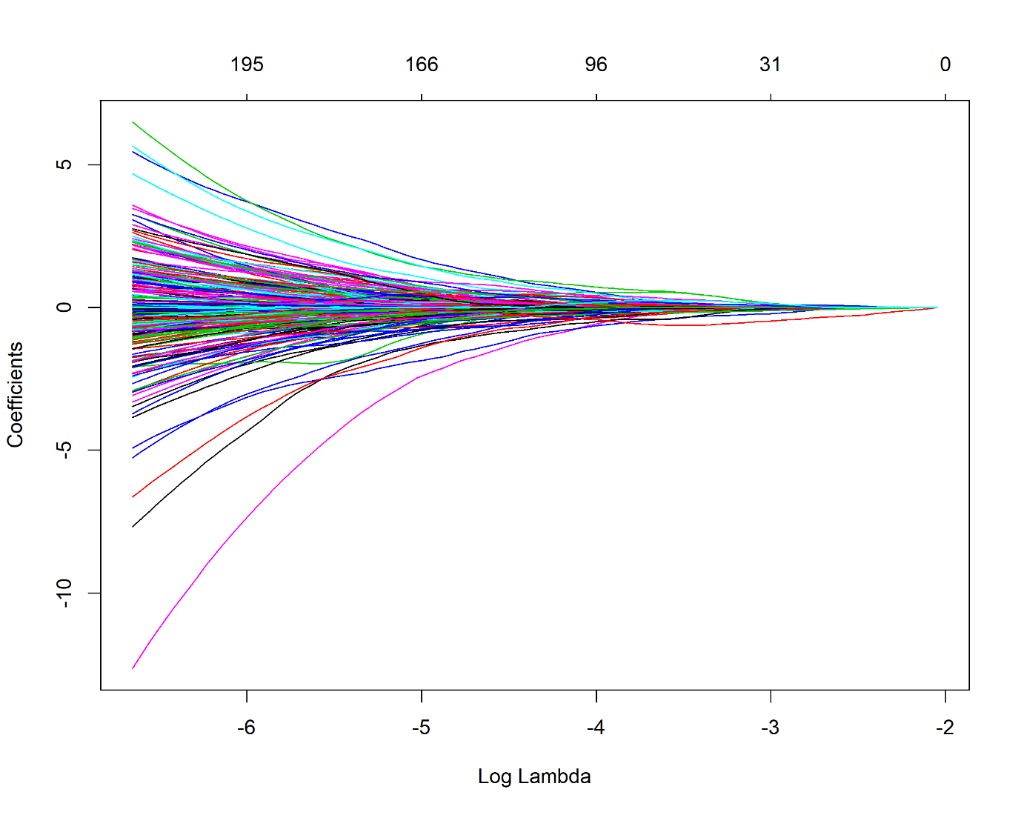


**Figure S6 Kaplan-Meier survival analysis by X-tile plots cut-off point.** The plot shows the chi squared log-rank values created when the cohort was divided into two groups. The optimal cut-point highlighted by the black circle in the left panels is shown on a histogram of the training cohort (middle panels) and a Kaplan-Meier plot (right panels).


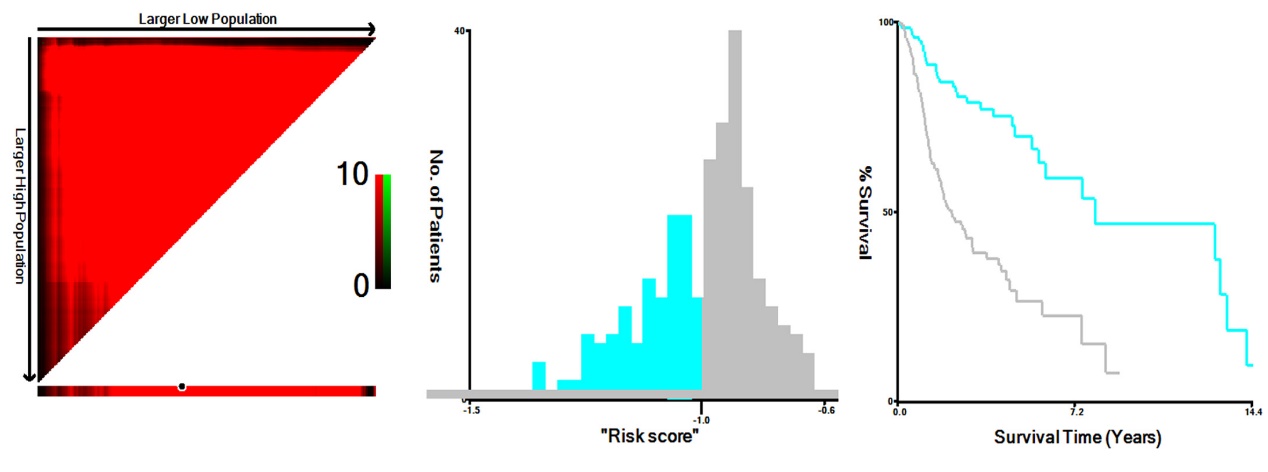


**Figure S7 The correlation between the expression levels of six mRNAs in the entire dataset and disease progression in HNSCC.** (A) FOXL2NB. (B) KCNJ18. (C) PCOLCE2. (D) RFPL1. (E) SPINK6. (F) ULBP2. Grade means histological grade.


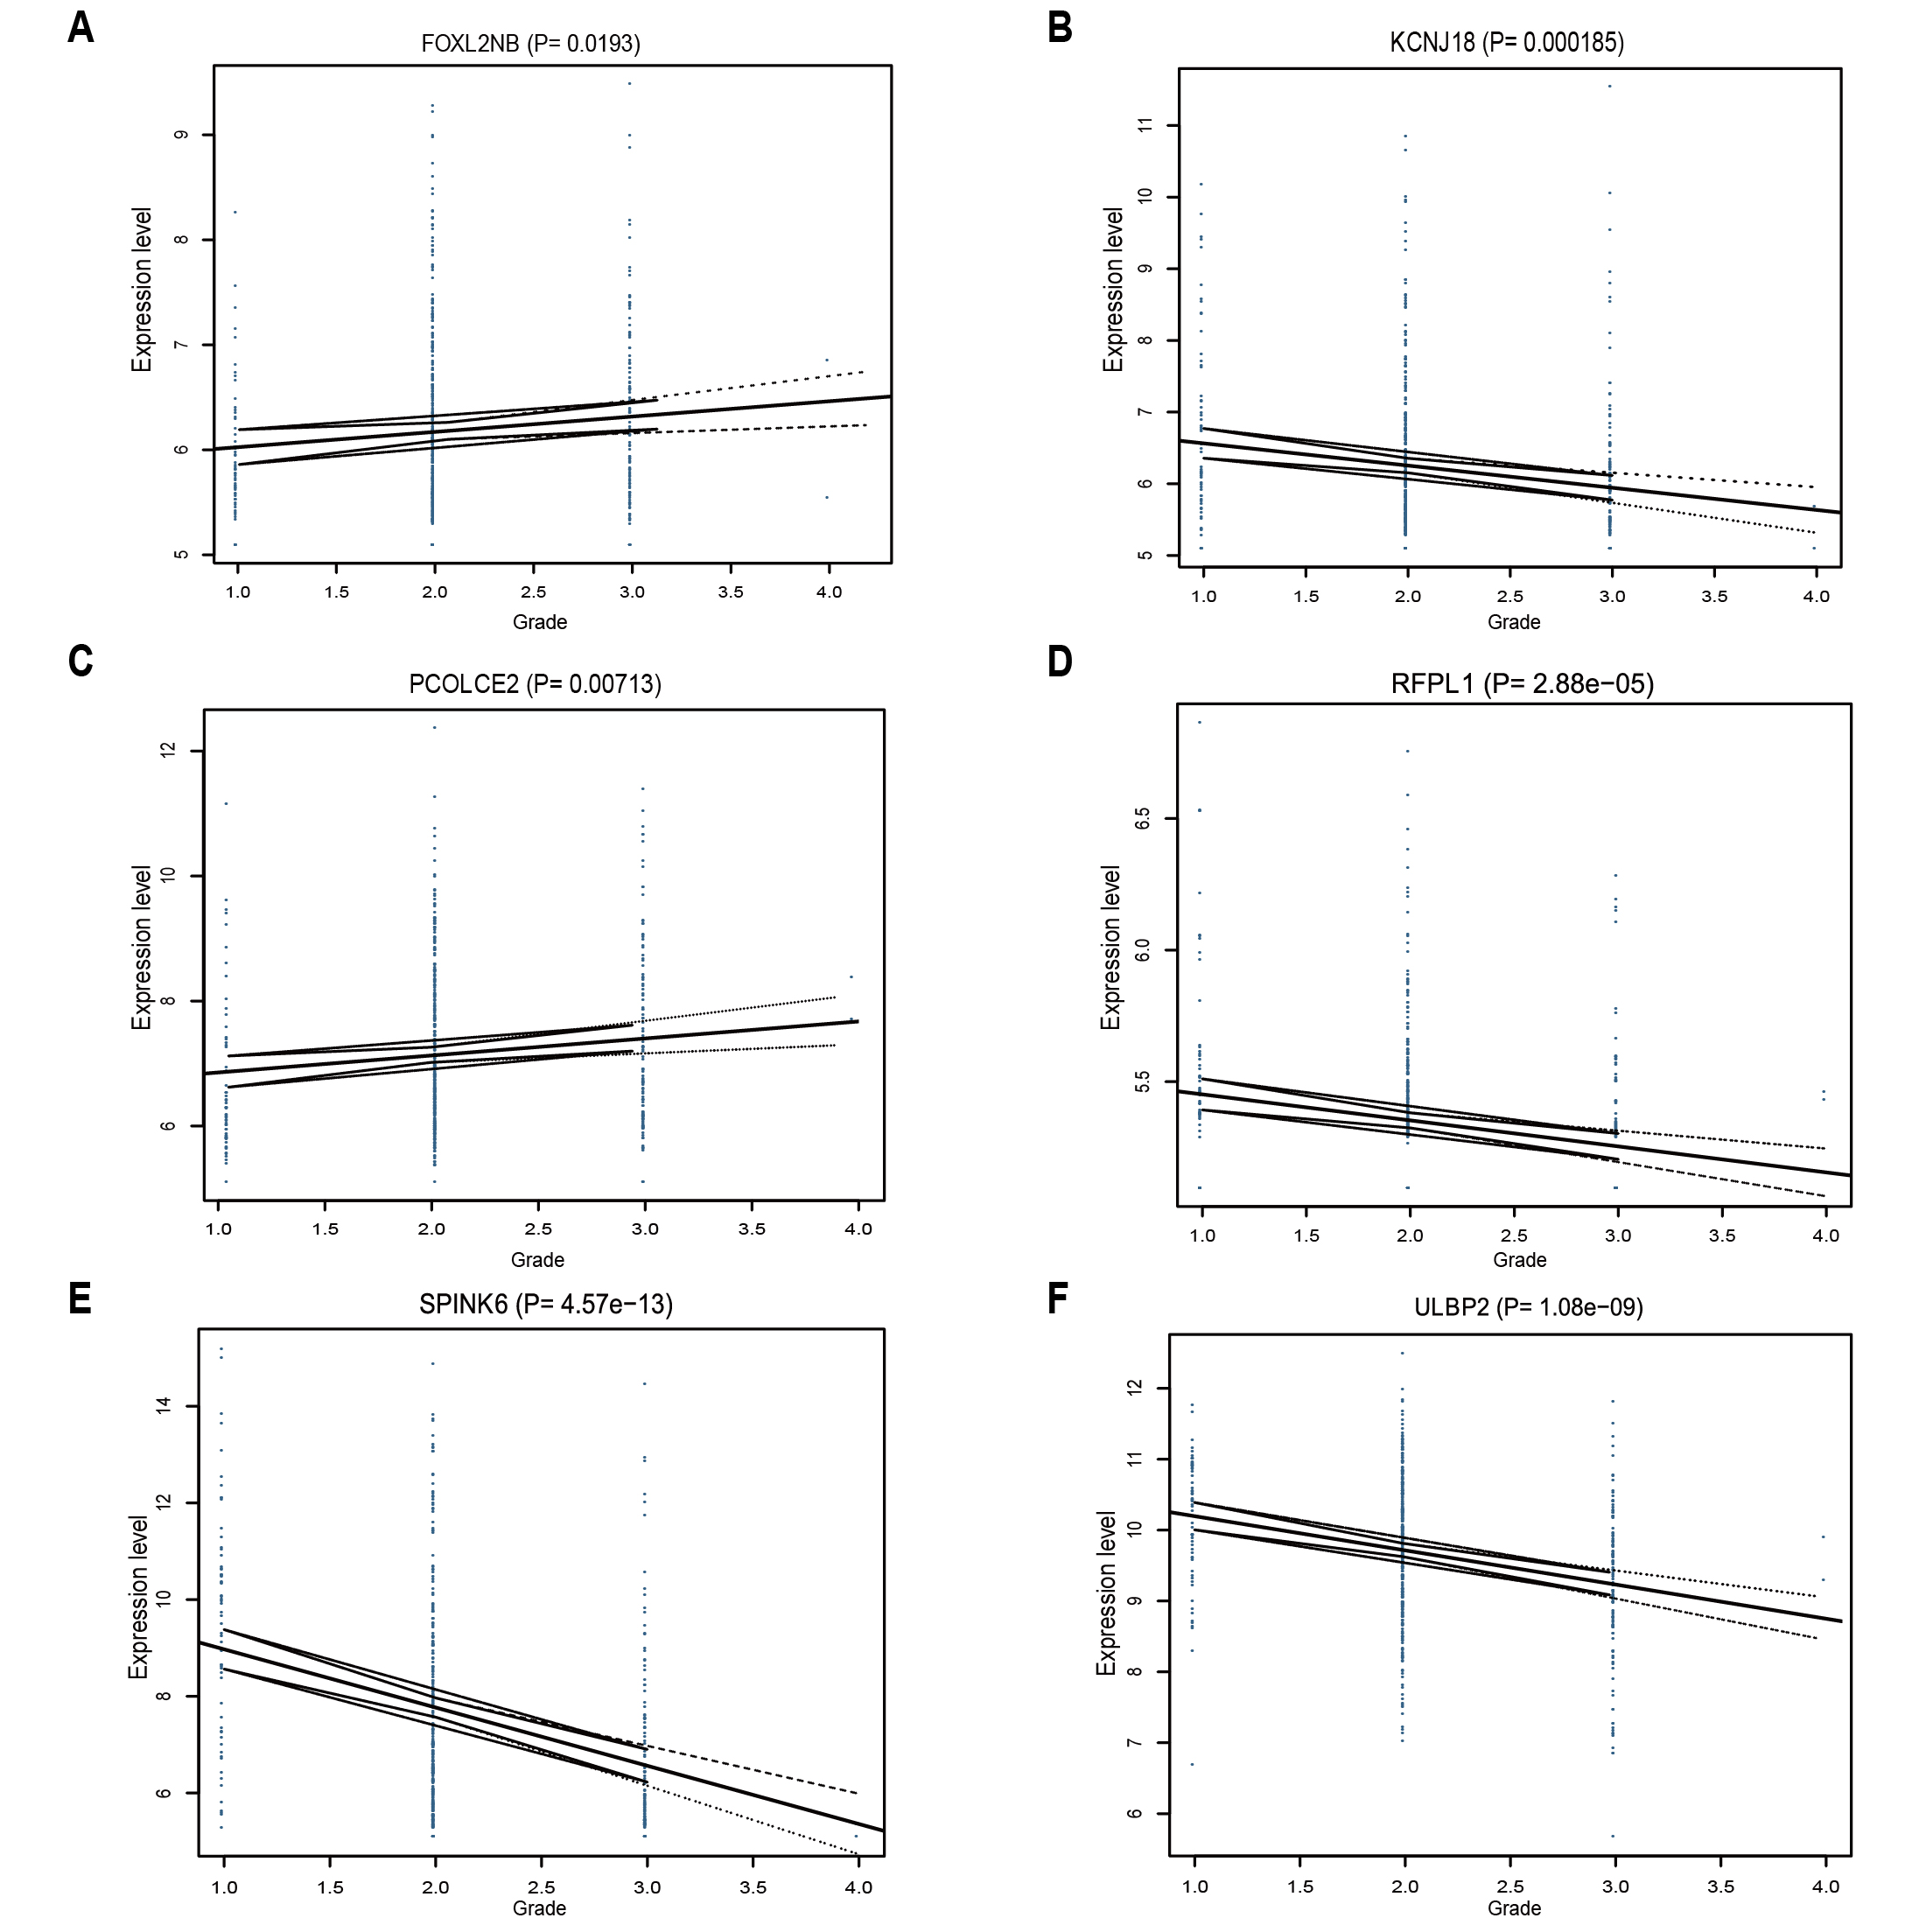


**Figure S8 Validation of the prognostic value of the six-mRNA signature in the test dataset and in the GSE65858 dataset.** (A-F) The survival plot and the 5-year survival receiving operating characteristic curve (ROC) of OS, DSS and PFS in the test dataset. (G-I) The relationship between risk score, survival information and z-score transformed expression value was shown (top-down, FOXL2NB, PCOLCE2, SPINK6, ULBP2, KCNJ18, RFPL1) in the test dataset. (J) The overall survival plot in the GSE65858 dataset.


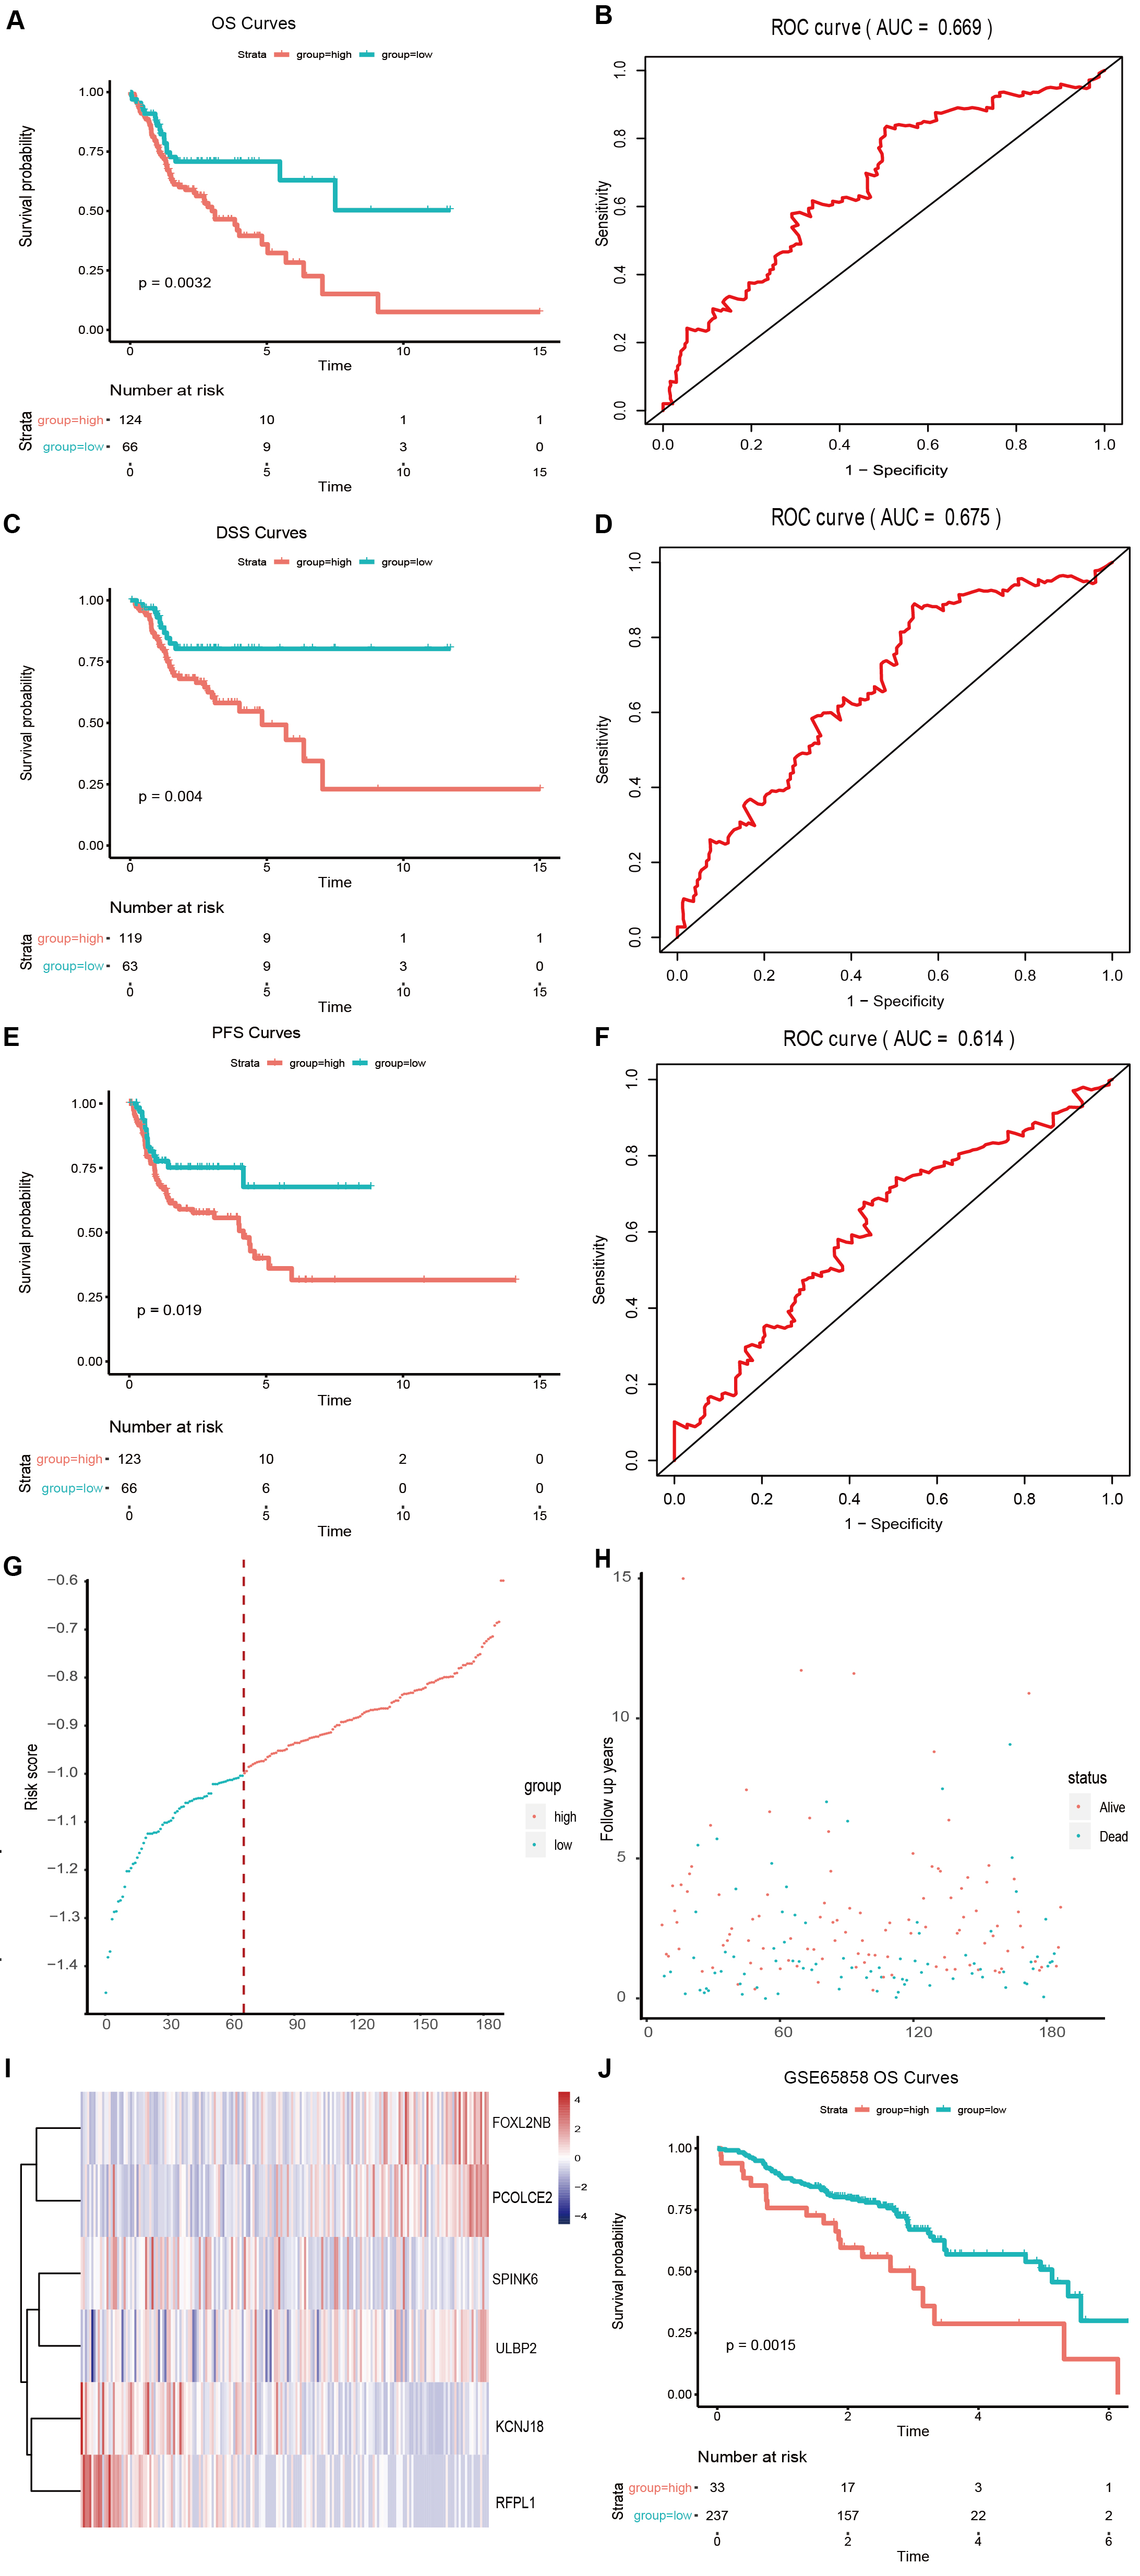


**Figure S9 Kaplan-Meier estimates of the overall survival of patients with different tumor tissue site (Larynx and Oral Tongue).** Kaplan-Meier estimates of the OS (A,E) and DSS (C,G) of patients; ROC curves show the sensitivity and specificity of the six-mRNA signature in predicting the patient OS (B,F) and DSS (D,H).


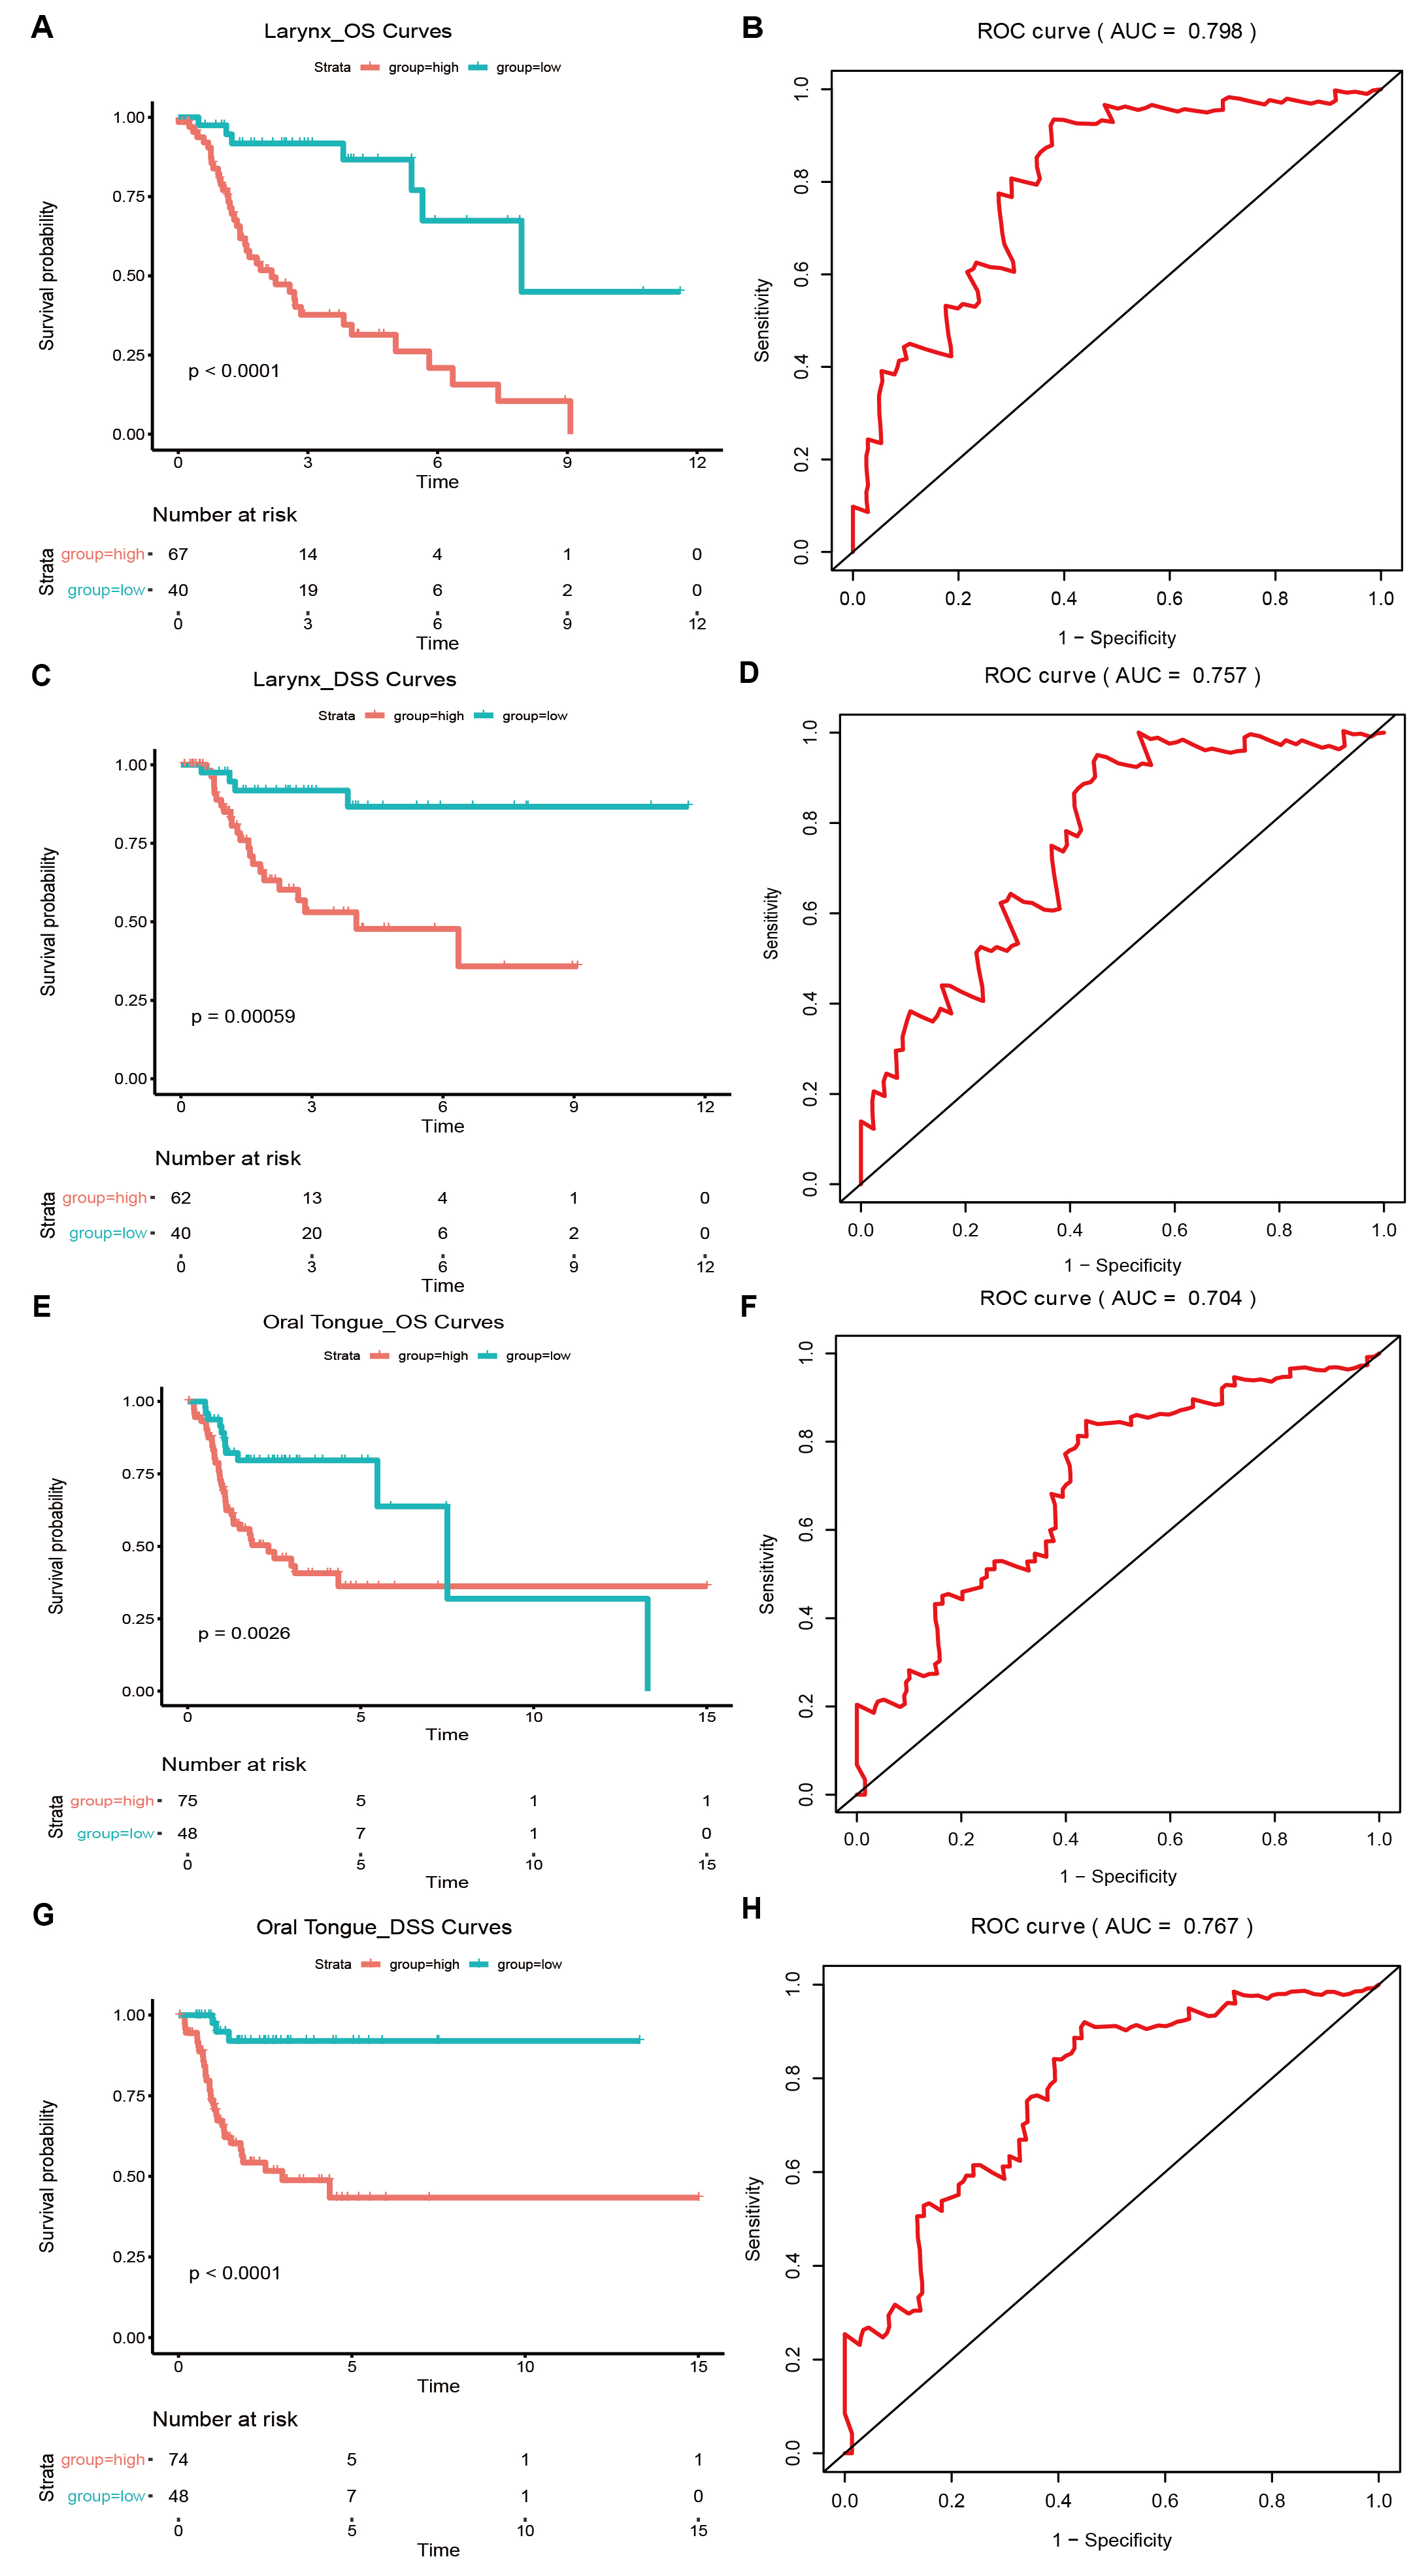


**Figure S10 Kaplan-Meier survival curves show correlation between the six-mRNA signature and OS and DSS in HPV-negative HNSCC patients.** Kaplan-Meier estimates of the OS (A) and DSS (C) of patients; ROC curves show the sensitivity and specificity of the six-mRNA signature in predicting the patient OS (B) and DSS (D).
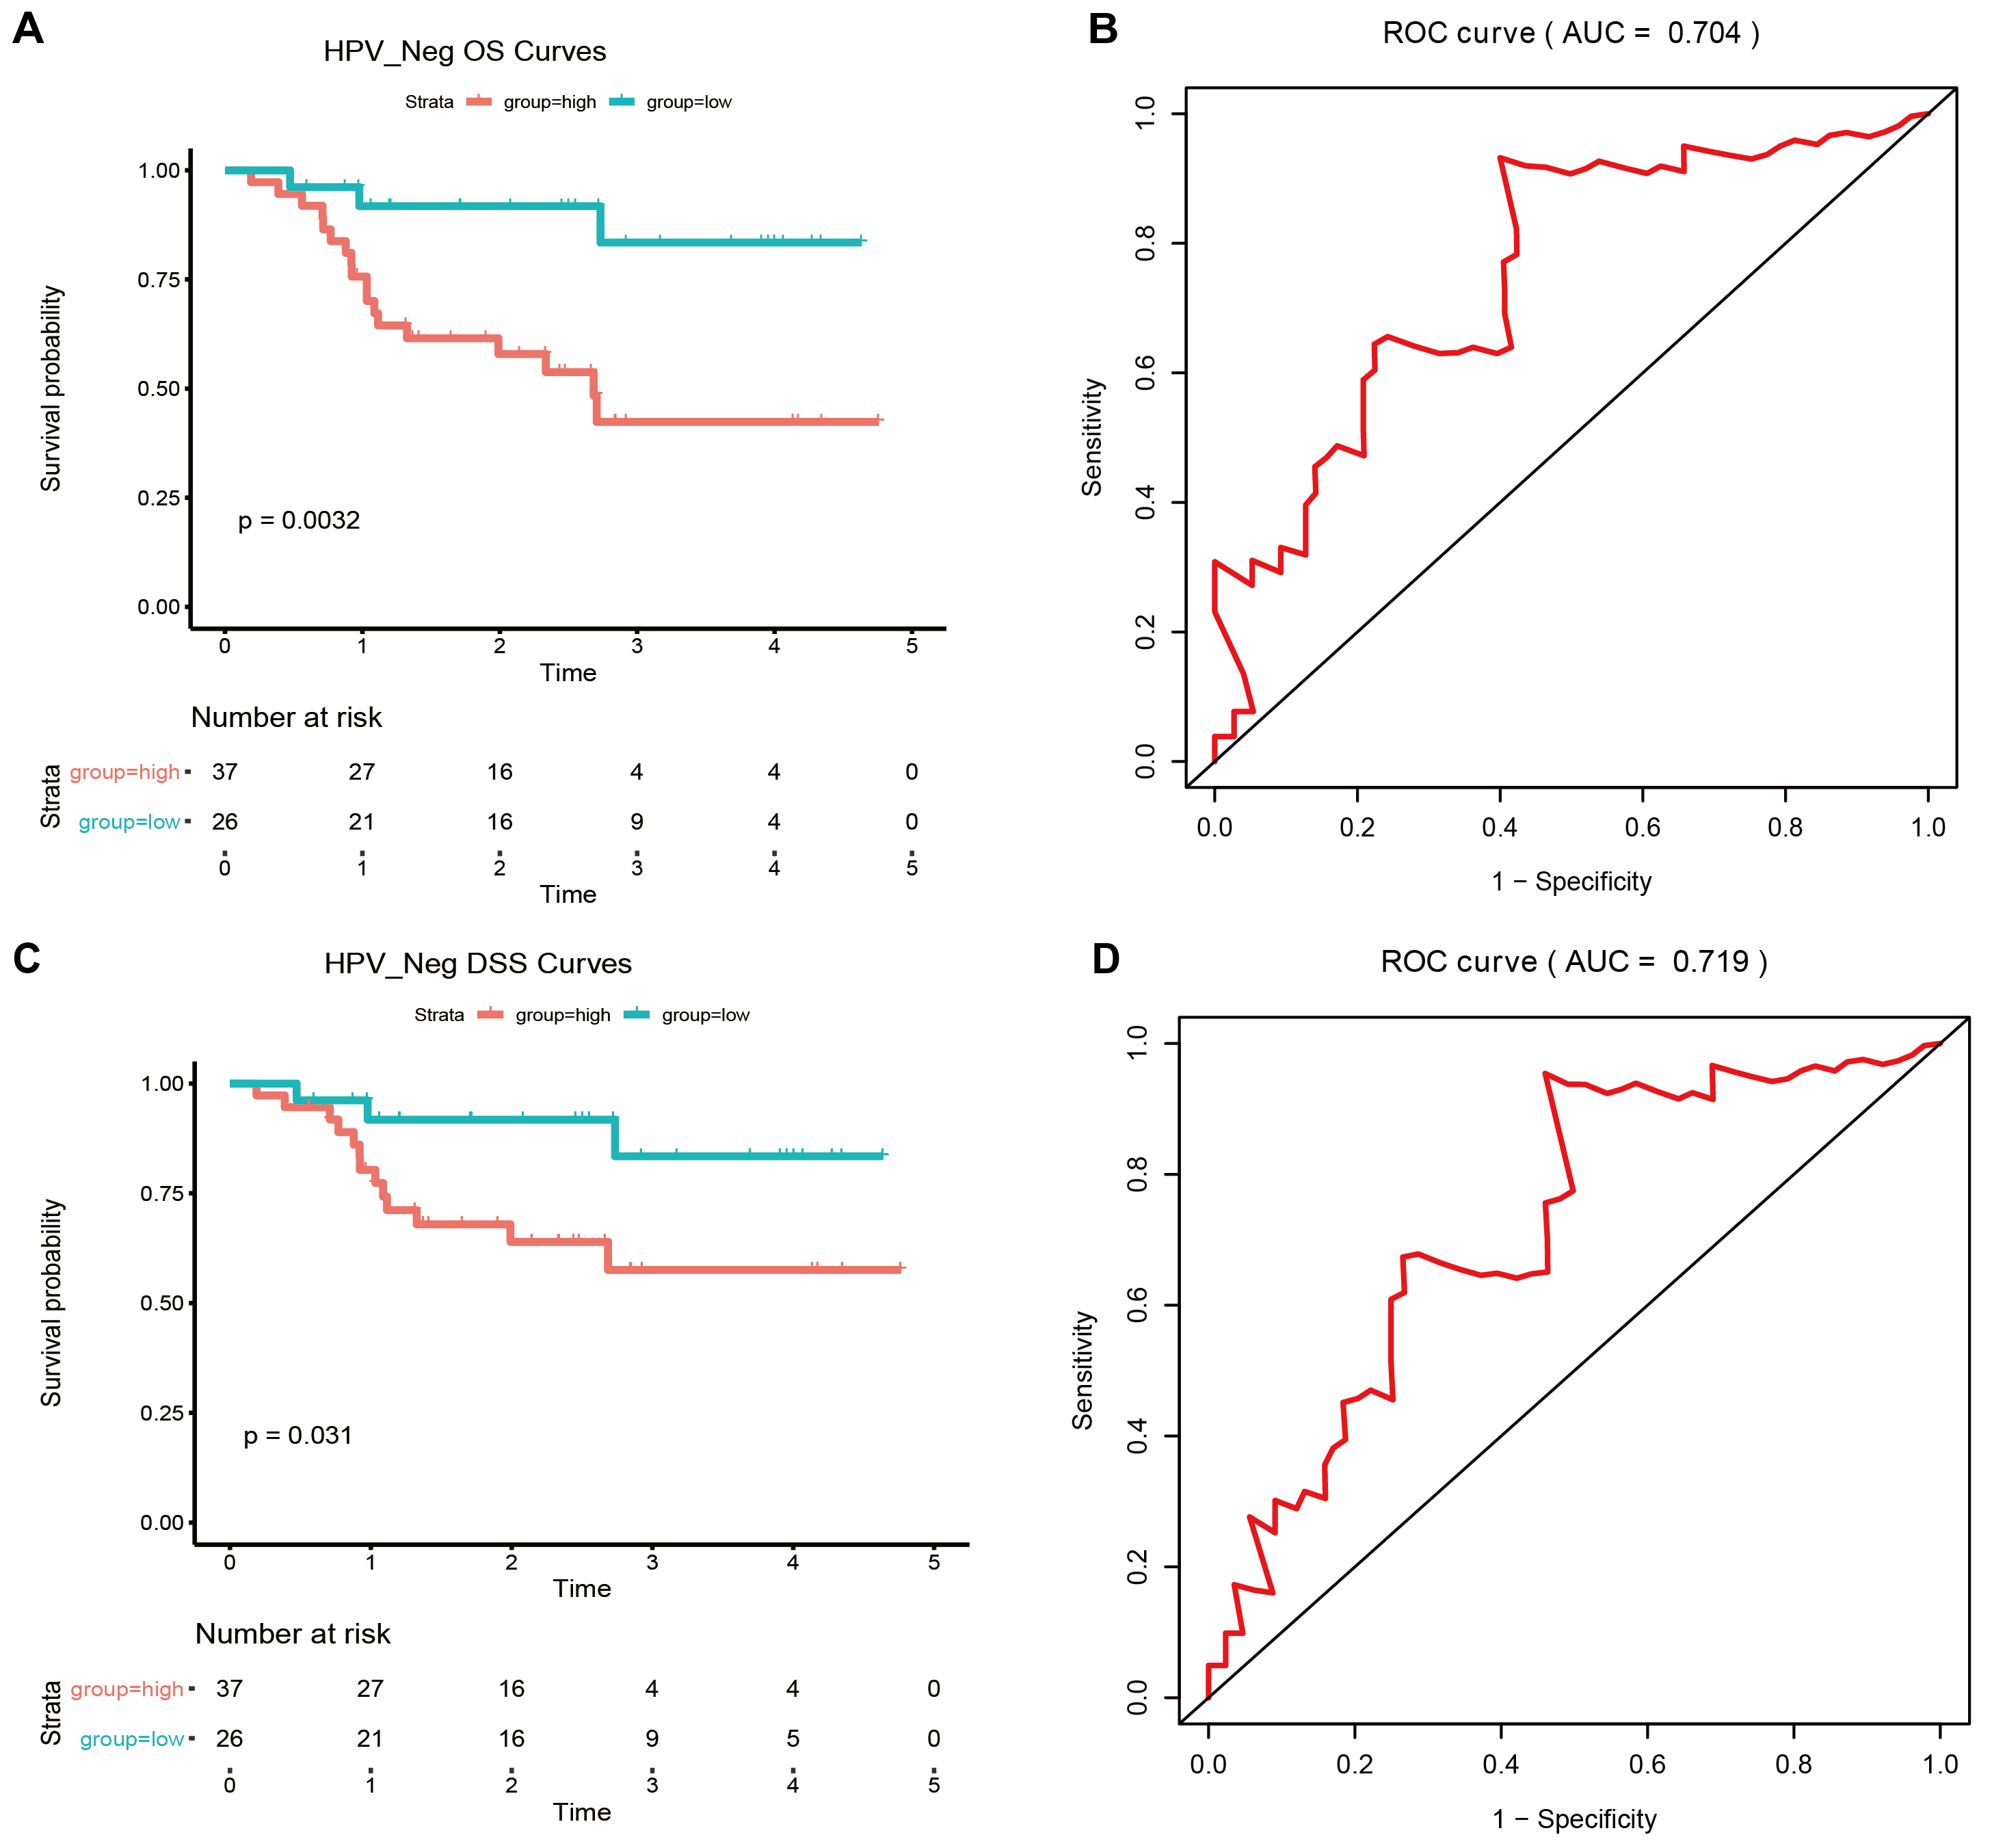


**Figure S11 The survival rate of patients with radiation therapy.** Kaplan-Meier estimates of the OS (A) and DSS (C) of patients; ROC curves show the sensitivity and specificity of the six-mRNA signature in predicting the patient OS (B) and DSS (D).


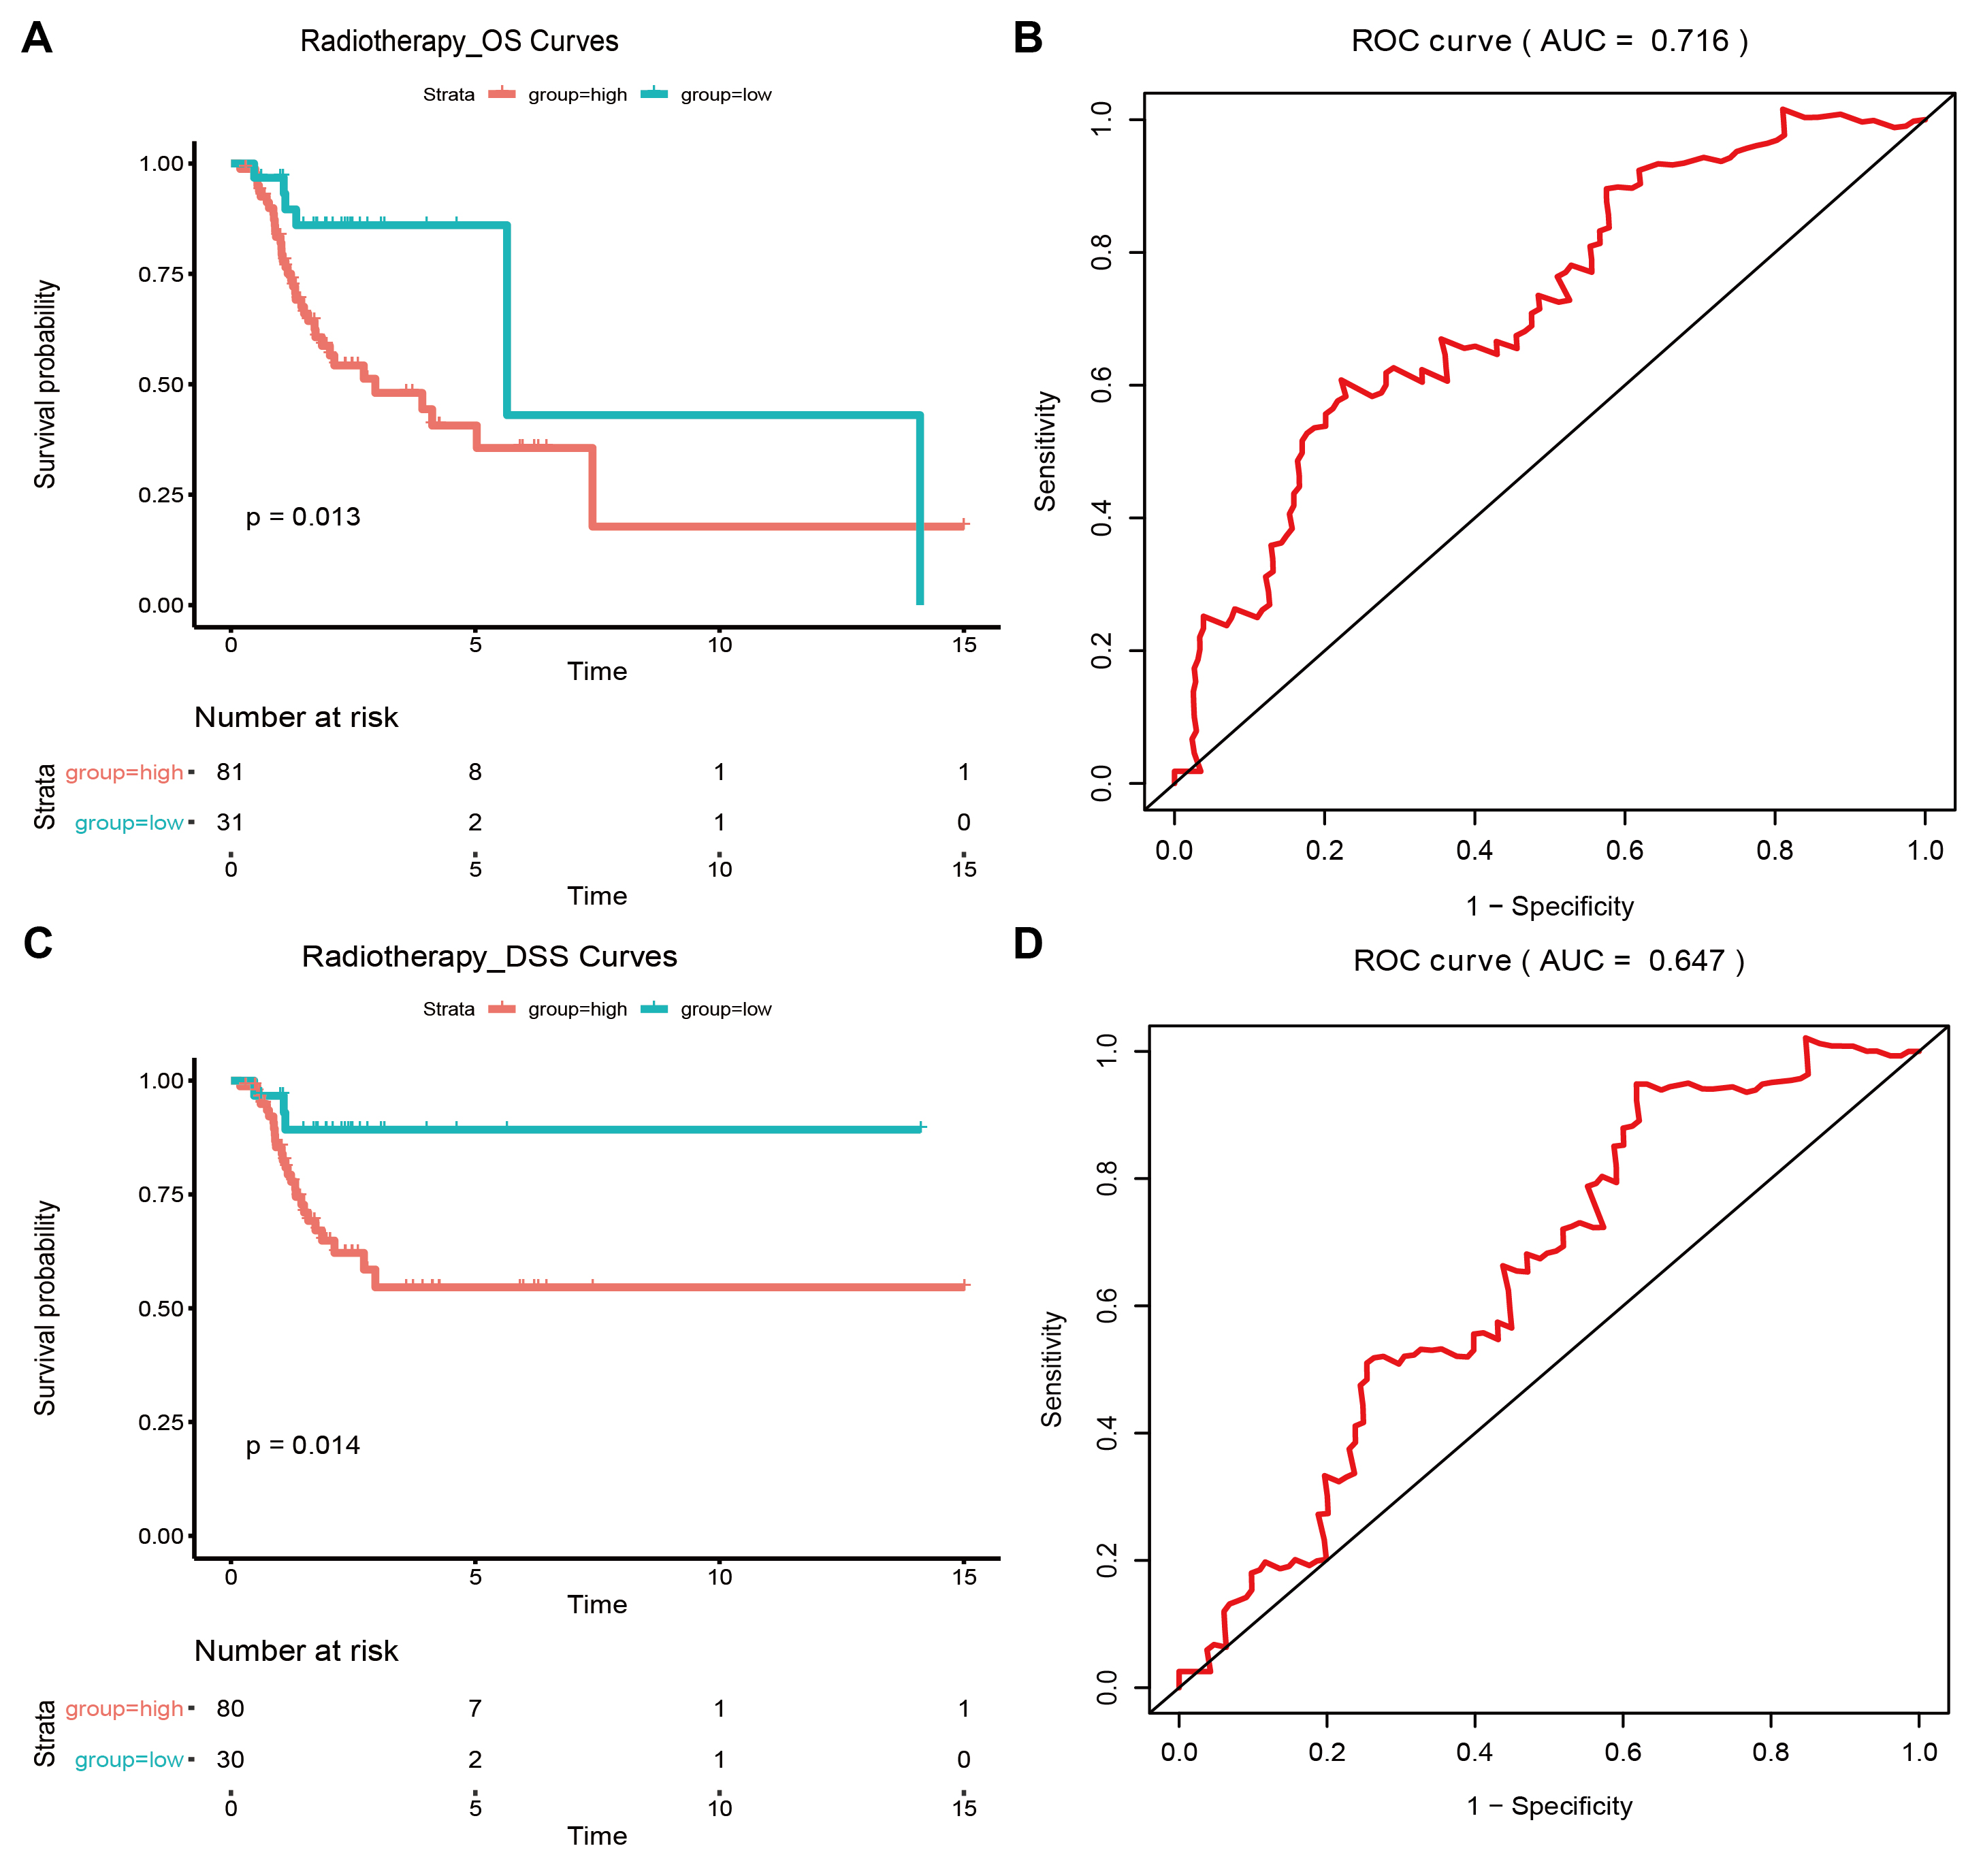

Supplement: Supplementary file 1 [file get_supplementary_file.php]
